# Supplementary material
Source: HighWire-hosted journal article supplement (https://emj.bmj.com/content/emermed-2019-208849)
Supplement: inline-supplementary-material-1 [file inline-supplementary-material-1.pdf]

TABLE A1. Full results of the fixed effects multivariate regression

|                          | Model (a)   | 95% CIs         | Model (b)   | 95% CIs         |
|--------------------------|-------------|-----------------|-------------|-----------------|
| Daily admissions ratio   | 0.0814***   | [0.063,0.100]   |             |                 |
| Monday                   | 0.0180***   | [0.013,0.023]   | -0.00363    | [-0.010,0.003]  |
| Tuesday                  | 0.0121***   | [0.008,0.016]   | -0.00967*** | [-0.015,-0.004] |
| Thursday                 | -0.00792*** | [-0.012,-0.004] | -0.00499*   | [-0.010,-0.000] |
| Friday                   | -0.0148***  | [-0.020,-0.010] | -0.0126***  | [-0.018,-0.007] |
| Saturday                 | -0.00367    | [-0.010,0.003]  | -0.0131**   | [-0.021,-0.005] |
| Sunday                   | 0.0175***   | [0.011,0.024]   | -0.00270    | [-0.014,0.008]  |
| Long-stay patients       | 0.0692*     | [0.008,0.130]   | 0.128***    | [0.064,0.192]   |
| % Female                 | 0.0269      | [-0.013,0.067]  | 0.0333      | [-0.007,0.073]  |
| % No investigation       | 0.0394      | [-0.001,0.079]  | 0.0238      | [-0.011,0.058]  |
| % Psychiatric conditions | -0.0334     | [-0.236,0.169]  | -0.101      | [-0.297,0.094]  |
| % Self-referrals         | -0.0436*    | [-0.079,-0.008] | -0.0673***  | [-0.099,-0.035] |
| % Emergency services     | -0.0295     | [-0.082,0.023]  | -0.0344     | [-0.087,0.018]  |
| Christmas                | -0.0506***  | [-0.063,-0.038] | -0.0580***  | [-0.072,-0.044] |
| New Year's Eve           | 0.0247**    | [0.010,0.039]   | 0.0523***   | [0.037,0.067]   |
| New Year's Day           | 0.00641     | [-0.007,0.020]  | 0.0111      | [-0.002,0.024]  |
| Flu                      | 0.384       | [-0.263,1.031]  | 0.485       | [-0.125,1.095]  |
| Size of ED               | 0.0000788   | [-0.000,0.000]  | 0.0000501   | [-0.000,0.000]  |
| % A&E Senior doctors     | -0.0469     | [-0.270,0.177]  | -0.0375     | [-0.272,0.197]  |
| % Respiratory medicine   | 0.0263*     | [0.005,0.047]   | 0.0254*     | [0.005,0.046]   |
| Age of attendance 21-40  | 0.0892**    | [0.023,0.155]   | 0.0924**    | [0.026,0.159]   |
| Age of attendance 41-60  | 0.202***    | [0.136,0.268]   | 0.225***    | [0.158,0.291]   |
| Age of attendance 61-80  | 0.401***    | [0.331,0.471]   | 0.465***    | [0.398,0.533]   |
| Age of attendance 80+    | 0.567***    | [0.475,0.659]   | 0.665***    | [0.574,0.756]   |
| week=1                   | 0           | [0.000,0.000]   | 0           | [0.000,0.000]   |
| week=2                   | -0.0446***  | [-0.054,-0.035] | -0.0326***  | [-0.042,-0.024] |
| week=3                   | -0.0737***  | [-0.085,-0.063] | -0.0625***  | [-0.073,-0.052] |
| week=4                   | -0.0657***  | [-0.077,-0.054] | -0.0535***  | [-0.065,-0.042] |
| week=5                   | -0.0286***  | [-0.039,-0.018] | -0.0104     | [-0.021,0.000]  |
| week=6                   | -0.0658***  | [-0.077,-0.055] | -0.0526***  | [-0.064,-0.041] |
| week=7                   | -0.0753***  | [-0.088,-0.063] | -0.0643***  | [-0.077,-0.052] |
| week=8                   | -0.0694***  | [-0.082,-0.057] | -0.0570***  | [-0.070,-0.044] |
| week=9                   | -0.0677***  | [-0.080,-0.056] | -0.0518***  | [-0.064,-0.040] |
| week=48                  | -0.0718***  | [-0.088,-0.056] | 0           | [0.000,0.000]   |
| week=49                  | -0.0404***  | [-0.052,-0.029] | -0.0224***  | [-0.035,-0.010] |

|                                   |            |                 |            |                 |
|-----------------------------------|------------|-----------------|------------|-----------------|
| week=50                           | -0.0240*** | [-0.034,-0.014] | -0.00829   | [-0.019,0.002]  |
| week=51                           | -0.0633*** | [-0.073,-0.054] | -0.0576*** | [-0.068,-0.047] |
| week=52                           | -0.0526*** | [-0.062,-0.043] | -0.0851*** | [-0.096,-0.074] |
| Bed occupancy=85                  | 0          | [0.000,0.000]   |            |                 |
| Bed occupancy=86                  | 0.0120     | [-0.001,0.025]  |            |                 |
| Bed occupancy=87                  | 0.00907    | [-0.002,0.020]  |            |                 |
| Bed occupancy=88                  | 0.0265***  | [0.015,0.038]   |            |                 |
| Bed occupancy=89                  | 0.0233***  | [0.012,0.035]   |            |                 |
| Bed occupancy=90                  | 0.0346***  | [0.022,0.047]   |            |                 |
| Bed occupancy=91                  | 0.0351***  | [0.023,0.047]   |            |                 |
| Bed occupancy=92                  | 0.0394***  | [0.026,0.052]   |            |                 |
| Bed occupancy=93                  | 0.0425***  | [0.029,0.056]   |            |                 |
| Bed occupancy=94                  | 0.0492***  | [0.036,0.063]   |            |                 |
| Bed occupancy=95                  | 0.0521***  | [0.038,0.066]   |            |                 |
| Bed occupancy=96                  | 0.0601***  | [0.046,0.074]   |            |                 |
| Bed occupancy=97                  | 0.0621***  | [0.047,0.077]   |            |                 |
| Bed occupancy=98                  | 0.0714***  | [0.056,0.086]   |            |                 |
| Bed occupancy=99                  | 0.0843***  | [0.068,0.100]   |            |                 |
| Bed occupancy=100                 | 0.0927***  | [0.075,0.111]   |            |                 |
| Total admissions                  |            |                 | 0.0000152  | [-0.000,0.000]  |
| L1. Admissions : discharges ratio |            |                 | 0.0466***  | [0.034,0.059]   |
| L2. Admissions : discharges ratio |            |                 | 0.0544***  | [0.042,0.067]   |
| Admissions : discharges ratio     |            |                 | 0.0370***  | [0.017,0.057]   |
| Observations                      | 11790      |                 | 11544      |                 |
| R <sup>2</sup>                    | 0.263      |                 | 0.230      |                 |

The results for the bed occupancy intervals below and equal to 85% are grouped in the 85% category - only 6% of observations of bed occupancy were below that level and the results of the regression on those intervals were not significant.

95% confidence intervals in brackets

\*  $p < 0.05$ , \*\*  $p < 0.01$ , \*\*\*  $p < 0.001$

**TABLE A2. Results of the robustness checks: fractional logit model with binomial family distribution**

|                          | <b>Model (a)</b> | <b>95% CIs</b>  | <b>Model (b)</b> | <b>95% CIs</b>  |
|--------------------------|------------------|-----------------|------------------|-----------------|
| Daily admissions ratio   | 0.639***         | [0.500,0.777]   |                  |                 |
| Monday                   | 0.103***         | [0.069,0.136]   | 0.0622           | [-0.024,0.149]  |
| Tuesday                  | 0.0724***        | [0.046,0.099]   | 0.0259           | [-0.054,0.106]  |
| Thursday                 | -0.0468**        | [-0.075,-0.019] | -0.0484**        | [-0.084,-0.013] |
| Friday                   | -0.0961***       | [-0.136,-0.056] | -0.116***        | [-0.167,-0.065] |
| Saturday                 | 0.00127          | [-0.045,0.048]  | -0.0734          | [-0.173,0.026]  |
| Sunday                   | 0.134***         | [0.085,0.182]   | 0.0655           | [-0.081,0.212]  |
| Long-stay patients       | 0.797            | [-0.103,1.698]  | 1.008*           | [0.048,1.968]   |
| % Female                 | 0.209            | [-0.681,1.099]  | 0.435            | [-0.376,1.246]  |
| % No investigation       | 0.180            | [-0.456,0.816]  | 0.158            | [-0.496,0.813]  |
| % Psychiatric conditions | 0.796            | [-4.158,5.751]  | -0.303           | [-5.427,4.822]  |
| % Self-referrals         | -1.108***        | [-1.528,-0.688] | -1.091***        | [-1.507,-0.675] |
| % Emergency services     | -0.449           | [-0.990,0.091]  | -0.441           | [-0.988,0.107]  |
| Christmas                | -0.278***        | [-0.417,-0.138] | -0.431***        | [-0.586,-0.277] |
| New Year's Eve           | 0.144*           | [0.021,0.267]   | 0.268***         | [0.129,0.406]   |
| New Year's Day           | 0.0236           | [-0.069,0.116]  | 0.0410           | [-0.050,0.132]  |
| Flu                      | 1.548            | [-6.118,9.214]  | 0.0268           | [-7.939,7.992]  |
| Size of ED               | 0.00116***       | [0.001,0.002]   | 0.00115***       | [0.001,0.002]   |
| % A&E Senior doctors     | -0.992           | [-2.224,0.241]  | -0.875           | [-2.141,0.391]  |
| % Respiratory medicine   | 0.161            | [-0.341,0.663]  | 0.222            | [-0.304,0.747]  |
| Age of attendance 21-40  | 1.762***         | [0.736,2.788]   | 1.891***         | [0.843,2.939]   |
| Age of attendance 41-60  | 1.576**          | [0.505,2.647]   | 1.719***         | [0.705,2.732]   |
| Age of attendance 61-80  | 2.297***         | [1.204,3.389]   | 2.623***         | [1.572,3.675]   |
| Age of attendance 80+    | 2.168**          | [0.704,3.632]   | 2.853***         | [1.432,4.275]   |
| week=1                   | 0                | [0.000,0.000]   | 0                | [0.000,0.000]   |
| week=2                   | -0.239***        | [-0.299,-0.178] | -0.229***        | [-0.314,-0.143] |
| week=3                   | -0.431***        | [-0.501,-0.361] | -0.428***        | [-0.525,-0.331] |
| week=4                   | -0.382***        | [-0.457,-0.307] | -0.368***        | [-0.469,-0.268] |
| week=5                   | -0.148***        | [-0.218,-0.078] | -0.0948*         | [-0.189,-0.000] |
| week=6                   | -0.378***        | [-0.459,-0.297] | -0.370***        | [-0.478,-0.262] |
| week=7                   | -0.445***        | [-0.534,-0.355] | -0.440***        | [-0.557,-0.324] |
| week=8                   | -0.404***        | [-0.506,-0.303] | -0.390***        | [-0.516,-0.265] |
| week=9                   | -0.389***        | [-0.488,-0.290] | -0.364***        | [-0.498,-0.231] |
| week=48                  | -0.428***        | [-0.557,-0.298] |                  |                 |
| week=49                  | -0.210***        | [-0.300,-0.120] | -0.171**         | [-0.283,-0.059] |

|                                      |           |                 |           |                 |
|--------------------------------------|-----------|-----------------|-----------|-----------------|
| week=50                              | -0.120**  | [-0.195,-0.044] | -0.0888   | [-0.187,0.009]  |
| week=51                              | -0.354*** | [-0.433,-0.275] | -0.382*** | [-0.485,-0.279] |
| week=52                              | -0.258*** | [-0.337,-0.179] | -0.403*** | [-0.492,-0.315] |
| Bed occupancy=85                     | 0         | [0.000,0.000]   |           |                 |
| Bed occupancy=86                     | 0.115     | [-0.027,0.257]  |           |                 |
| Bed occupancy=87                     | 0.159*    | [0.035,0.283]   |           |                 |
| Bed occupancy=88                     | 0.324***  | [0.204,0.444]   |           |                 |
| Bed occupancy=89                     | 0.277**   | [0.105,0.449]   |           |                 |
| Bed occupancy=90                     | 0.340***  | [0.209,0.471]   |           |                 |
| Bed occupancy=91                     | 0.250***  | [0.104,0.396]   |           |                 |
| Bed occupancy=92                     | 0.293***  | [0.159,0.428]   |           |                 |
| Bed occupancy=93                     | 0.381***  | [0.241,0.520]   |           |                 |
| Bed occupancy=94                     | 0.345***  | [0.198,0.492]   |           |                 |
| Bed occupancy=95                     | 0.368***  | [0.213,0.524]   |           |                 |
| Bed occupancy=96                     | 0.414***  | [0.246,0.583]   |           |                 |
| Bed occupancy=97                     | 0.449***  | [0.273,0.624]   |           |                 |
| Bed occupancy=98                     | 0.464***  | [0.288,0.641]   |           |                 |
| Bed occupancy=99                     | 0.553***  | [0.373,0.733]   |           |                 |
| Bed occupancy=100                    | 0.632***  | [0.399,0.865]   |           |                 |
| Total admissions                     |           |                 | 0.000127  | [-0.000,0.001]  |
| L1. Admissions :<br>discharges ratio |           |                 | 0.152*    | [0.033,0.270]   |
| L2. Admissions :<br>discharges ratio |           |                 | 0.108     | [-0.084,0.301]  |
| Admissions : discharges<br>ratio     |           |                 | 0.0966    | [-0.125,0.319]  |
| Observations                         | 11790     |                 | 11544     |                 |
| $R^2$                                |           |                 |           |                 |

The results for the bed occupancy intervals below and equal to 85% are grouped in the 85% category - only 6% of observations of bed occupancy were below that level and the results of the regression on those intervals were not significant.

95% confidence intervals in brackets

\*  $p < 0.05$ , \*\*  $p < 0.01$ , \*\*\*  $p < 0.001$

**TABLE A3. Results of the robustness checks: bed occupancy as a continuous variable and as three indicators**

|                          | <b>Model (a) with<br/>bed occupancy as<br/>continuous</b> | <b>95% CIs</b>  | <b>Model (a) with<br/>bed occupancy in<br/>three indicators</b> | <b>95% CIs</b>  |
|--------------------------|-----------------------------------------------------------|-----------------|-----------------------------------------------------------------|-----------------|
| Daily admissions ratio   | 0.0862***                                                 | [0.067,0.106]   | 0.0844***                                                       | [0.065,0.103]   |
| Monday                   | 0.0182***                                                 | [0.013,0.023]   | 0.0187***                                                       | [0.014,0.023]   |
| Tuesday                  | 0.0133***                                                 | [0.009,0.017]   | 0.0133***                                                       | [0.009,0.017]   |
| Thursday                 | -0.00934***                                               | [-0.013,-0.005] | -0.00900***                                                     | [-0.013,-0.005] |
| Friday                   | -0.0202***                                                | [-0.025,-0.015] | -0.0190***                                                      | [-0.024,-0.014] |
| Saturday                 | -0.00959**                                                | [-0.016,-0.004] | -0.00790*                                                       | [-0.014,-0.002] |
| Sunday                   | 0.0166***                                                 | [0.011,0.023]   | 0.0174***                                                       | [0.011,0.023]   |
| Long-stay patients       | 0.0958**                                                  | [0.033,0.159]   | 0.0852**                                                        | [0.023,0.148]   |
| % Female                 | 0.0350                                                    | [-0.005,0.075]  | 0.0319                                                          | [-0.009,0.072]  |
| % No investigation       | 0.0425*                                                   | [0.007,0.078]   | 0.0385*                                                         | [0.000,0.077]   |
| % Psychiatric conditions | -0.0443                                                   | [-0.248,0.159]  | -0.0286                                                         | [-0.234,0.176]  |
| % Self-referrals         | -0.0447*                                                  | [-0.079,-0.010] | -0.0467**                                                       | [-0.078,-0.015] |
| % Emergency services     | -0.0314                                                   | [-0.083,0.021]  | -0.0311                                                         | [-0.082,0.020]  |
| Christmas                | -0.0628***                                                | [-0.076,-0.049] | -0.0577***                                                      | [-0.071,-0.045] |
| New Year's Eve           | 0.0324***                                                 | [0.017,0.047]   | 0.0300***                                                       | [0.015,0.045]   |
| New Year's Day           | 0.00163                                                   | [-0.012,0.015]  | 0.00360                                                         | [-0.009,0.017]  |
| Flu                      | 0.413                                                     | [-0.173,0.999]  | 0.436                                                           | [-0.162,1.034]  |
| Size of ED               | 0.0000692                                                 | [-0.000,0.000]  | 0.0000629                                                       | [-0.000,0.000]  |
| % A&E Senior doctors     | -0.0449                                                   | [-0.277,0.187]  | -0.0456                                                         | [-0.277,0.186]  |
| % Respiratory medicine   | 0.0262*                                                   | [0.005,0.047]   | 0.0261*                                                         | [0.005,0.047]   |
| Age of attendance 21-40  | 0.105**                                                   | [0.038,0.172]   | 0.0983**                                                        | [0.032,0.165]   |
| Age of attendance 41-60  | 0.219***                                                  | [0.152,0.286]   | 0.217***                                                        | [0.152,0.282]   |
| Age of attendance 61-80  | 0.416***                                                  | [0.344,0.488]   | 0.413***                                                        | [0.341,0.484]   |
| Age of attendance 80+    | 0.580***                                                  | [0.486,0.673]   | 0.578***                                                        | [0.485,0.671]   |
| week=1                   | 0                                                         | [0.000,0.000]   | 0                                                               | [0.000,0.000]   |
| week=2                   | -0.0445***                                                | [-0.054,-0.035] | -0.0445***                                                      | [-0.054,-0.035] |
| week=3                   | -0.0758***                                                | [-0.087,-0.065] | -0.0752***                                                      | [-0.086,-0.064] |
| week=4                   | -0.0678***                                                | [-0.079,-0.056] | -0.0673***                                                      | [-0.079,-0.056] |
| week=5                   | -0.0277***                                                | [-0.038,-0.017] | -0.0277***                                                      | [-0.038,-0.017] |
| week=6                   | -0.0672***                                                | [-0.078,-0.056] | -0.0670***                                                      | [-0.078,-0.056] |
| week=7                   | -0.0792***                                                | [-0.092,-0.067] | -0.0785***                                                      | [-0.091,-0.066] |
| week=8                   | -0.0721***                                                | [-0.085,-0.059] | -0.0712***                                                      | [-0.084,-0.059] |
| week=9                   | -0.0700***                                                | [-0.082,-0.058] | -0.0696***                                                      | [-0.082,-0.058] |

|                          |            |                 |            |                 |
|--------------------------|------------|-----------------|------------|-----------------|
| week=48                  | -0.0732*** | [-0.090,-0.057] | -0.0738*** | [-0.090,-0.057] |
| week=49                  | -0.0411*** | [-0.053,-0.029] | -0.0420*** | [-0.054,-0.030] |
| week=50                  | -0.0258*** | [-0.036,-0.016] | -0.0257*** | [-0.036,-0.016] |
| week=51                  | -0.0718*** | [-0.082,-0.062] | -0.0695*** | [-0.079,-0.060] |
| week=52                  | -0.0675*** | [-0.078,-0.057] | -0.0619*** | [-0.071,-0.052] |
| Bed occupancy continuous | 0.00127*** | [0.001,0.002]   |            |                 |
| Bed occupancy<88         |            |                 | 0          | [0.000,0.000]   |
| Bed occupancy88-92       |            |                 | 0.0227***  | [0.015,0.031]   |
| Bed occupancy>92         |            |                 | 0.0428***  | [0.033,0.053]   |
| Observations             | 11790      |                 | 11790      |                 |
| R <sup>2</sup>           | 0.241      |                 | 0.246      |                 |

Please note that only 6% of observations of bed occupancy are below 85%.

95% confidence intervals in brackets

\*  $p < 0.05$ , \*\*  $p < 0.01$ , \*\*\*  $p < 0.001$

**TABLE A4. Results of the robustness checks: bed occupancy as explanatory variable without covariates**

|                   | <b>Model (a) with<br/>bed occupancy</b> | <b>95% CIs</b> |
|-------------------|-----------------------------------------|----------------|
| Bed occupancy=85  | 0                                       | [0.000,0.000]  |
| Bed occupancy=86  | 0.00606                                 | [-0.008,0.020] |
| Bed occupancy=87  | 0.00588                                 | [-0.007,0.019] |
| Bed occupancy=88  | 0.0258***                               | [0.014,0.038]  |
| Bed occupancy=89  | 0.0236***                               | [0.011,0.036]  |
| Bed occupancy=90  | 0.0350***                               | [0.022,0.048]  |
| Bed occupancy=91  | 0.0347***                               | [0.022,0.047]  |
| Bed occupancy=92  | 0.0411***                               | [0.028,0.055]  |
| Bed occupancy=93  | 0.0447***                               | [0.031,0.059]  |
| Bed occupancy=94  | 0.0538***                               | [0.040,0.067]  |
| Bed occupancy=95  | 0.0586***                               | [0.044,0.073]  |
| Bed occupancy=96  | 0.0701***                               | [0.055,0.085]  |
| Bed occupancy=97  | 0.0724***                               | [0.058,0.087]  |
| Bed occupancy=98  | 0.0856***                               | [0.070,0.101]  |
| Bed occupancy=99  | 0.101***                                | [0.085,0.118]  |
| Bed occupancy=100 | 0.120***                                | [0.100,0.139]  |
| Observations      | 12130                                   |                |
| R2                | 0.071                                   |                |
